# Supplementary material for: Accurate detection of acute sleep deprivation using a metabolomic biomarker—A machine learning approach
Source: PubMed Central journal article supplement (PMC11094653; doi:10.1126/sciadv.adj6834), 2024-03-08
Supplement: sciadv.adj6834_sm.pdf [file sciadv.adj6834_sm.pdf]

Supplementary Materials for  
**Accurate detection of acute sleep deprivation using a metabolomic  
biomarker—A machine learning approach**

Katherine Jeppe *et al.*

Corresponding author: Clare Anderson, [clare.anderson@monash.edu](mailto:clare.anderson@monash.edu)

*Sci. Adv.* **10**, eadj6834 (2024)  
DOI: 10.1126/sciadv.adj6834

**This PDF file includes:**

Figs. S1 to S8  
Tables S1 to S7  
References

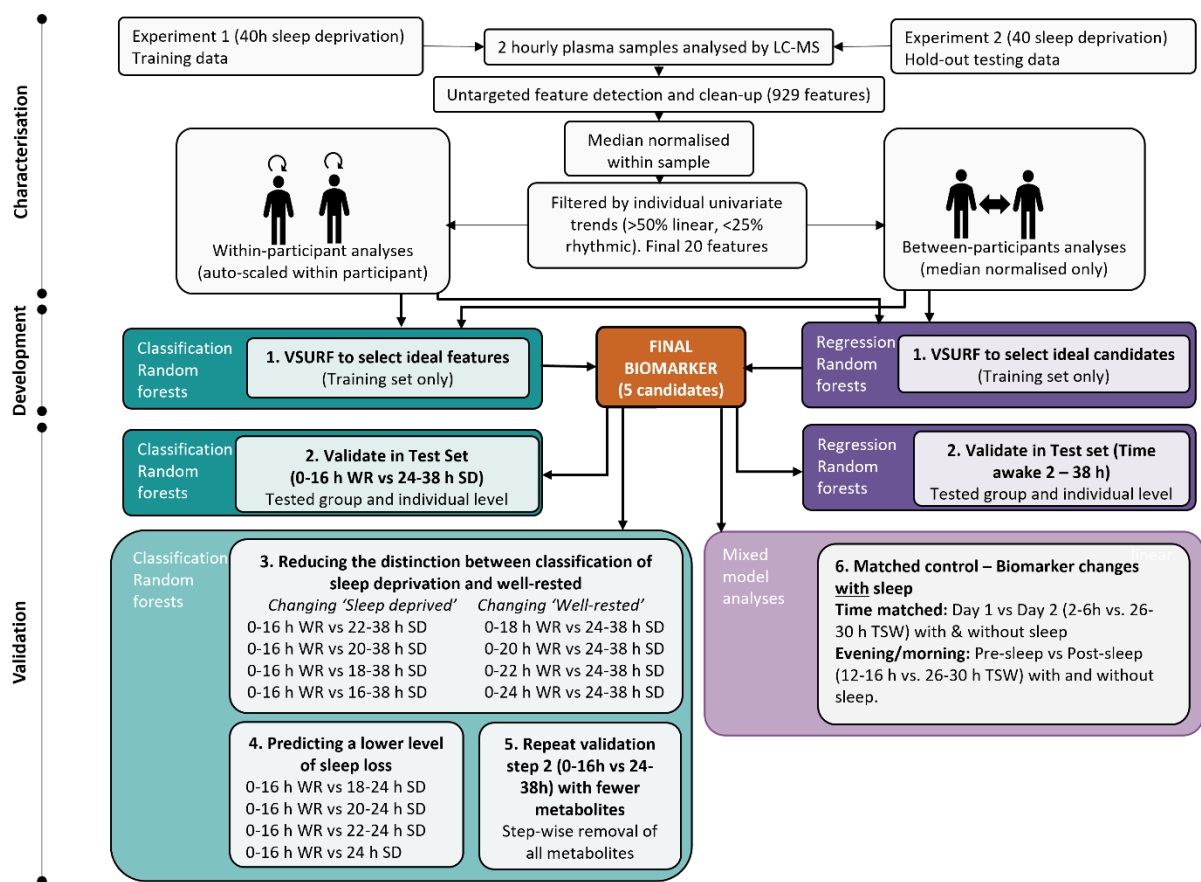

**Figure S1: Graphical Representation of our Approach and Analysis Plan.** Biomarkers were characterised by linear/circadian trends with time awake to reduce the final number of metabolites for development and modelling (only those with strong linear changes without circadian confounds). [1] For biomarker development, machine learning techniques identified the best candidates (using VSURF) to predict a level of sleep loss (classification) or time awake (regression). The 'best' five metabolites formed our final biomarker. [2] We validated our biomarker in an independent test set for both classification and regression, within and between subjects. [3] We assessed biomarker accuracy when classifying lower cut-offs of sleep deprivation (e.g., 22h, 20h etc) and less conservative cut-offs for well-rested (e.g., 18h, 20h). [4] We then examined accuracy with a lower, more real-world level of sleep loss (<16h versus 18-24h, i.e., day versus night only). [5] As some metabolites may not be useful in future, we re-tested the primary analyses [1] but with all possible metabolite combinations. [6] Finally, we checked the 'recovery' of the biomarker with a period of sleep using both circadian time matched AND pre/post sleep.

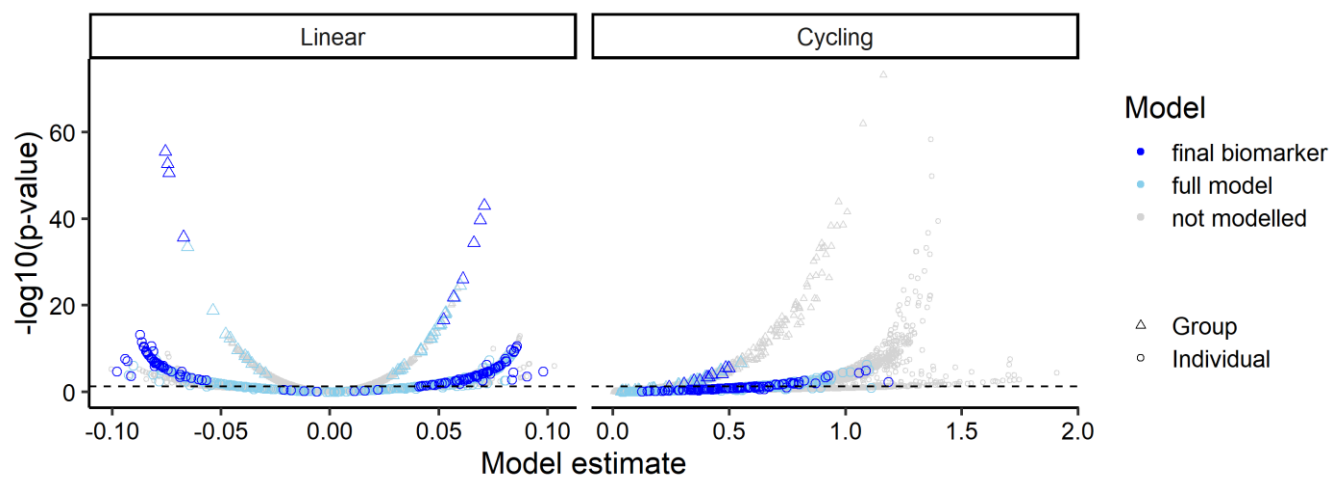

**Figure S2. Volcano plots showing group and individual level significance ( $-\log_{10}(\text{p-value})$ ) against model estimate (slope for linear models and amplitude for cosinor models) of 929 features detected with hydrophilic interaction liquid chromatography-mass spectrometry (HILIC LC-MS). Symbol colours indicate if features were included in the final biomarker (dark blue), passed the data reduction filter (full model; light blue) or were not modelled (grey). Group models are displayed as triangles and individual models are displayed as circles. Significance at the  $p = 0.05$  is indicated with a dashed line.**

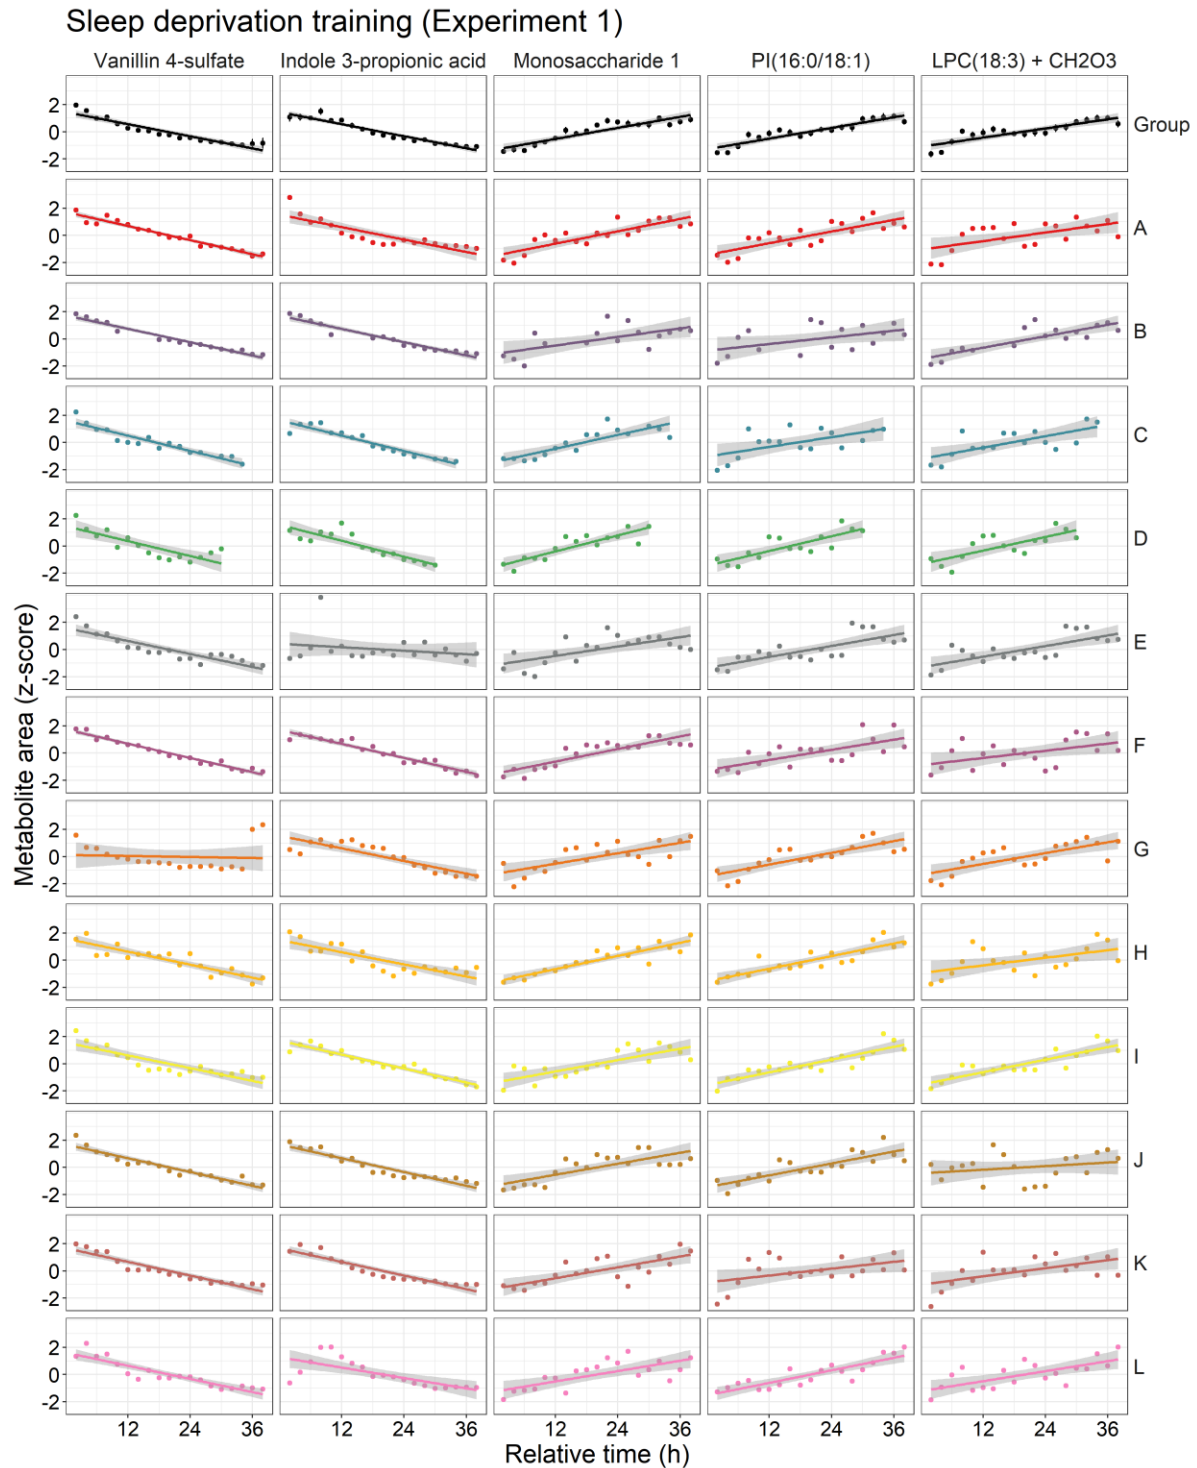

**Figure S3. Within-participant group and individual level trends of five consistently important metabolites across time since wake in Experiment 1 (sleep deprivation training).** Displaying metabolite peak area (median normalised z-scored within participant) and linear fit with shaded 95% CI for each participant (A-L) and **standard error bars** for group points.

## Sleep deprivation testing (Experiment 2)

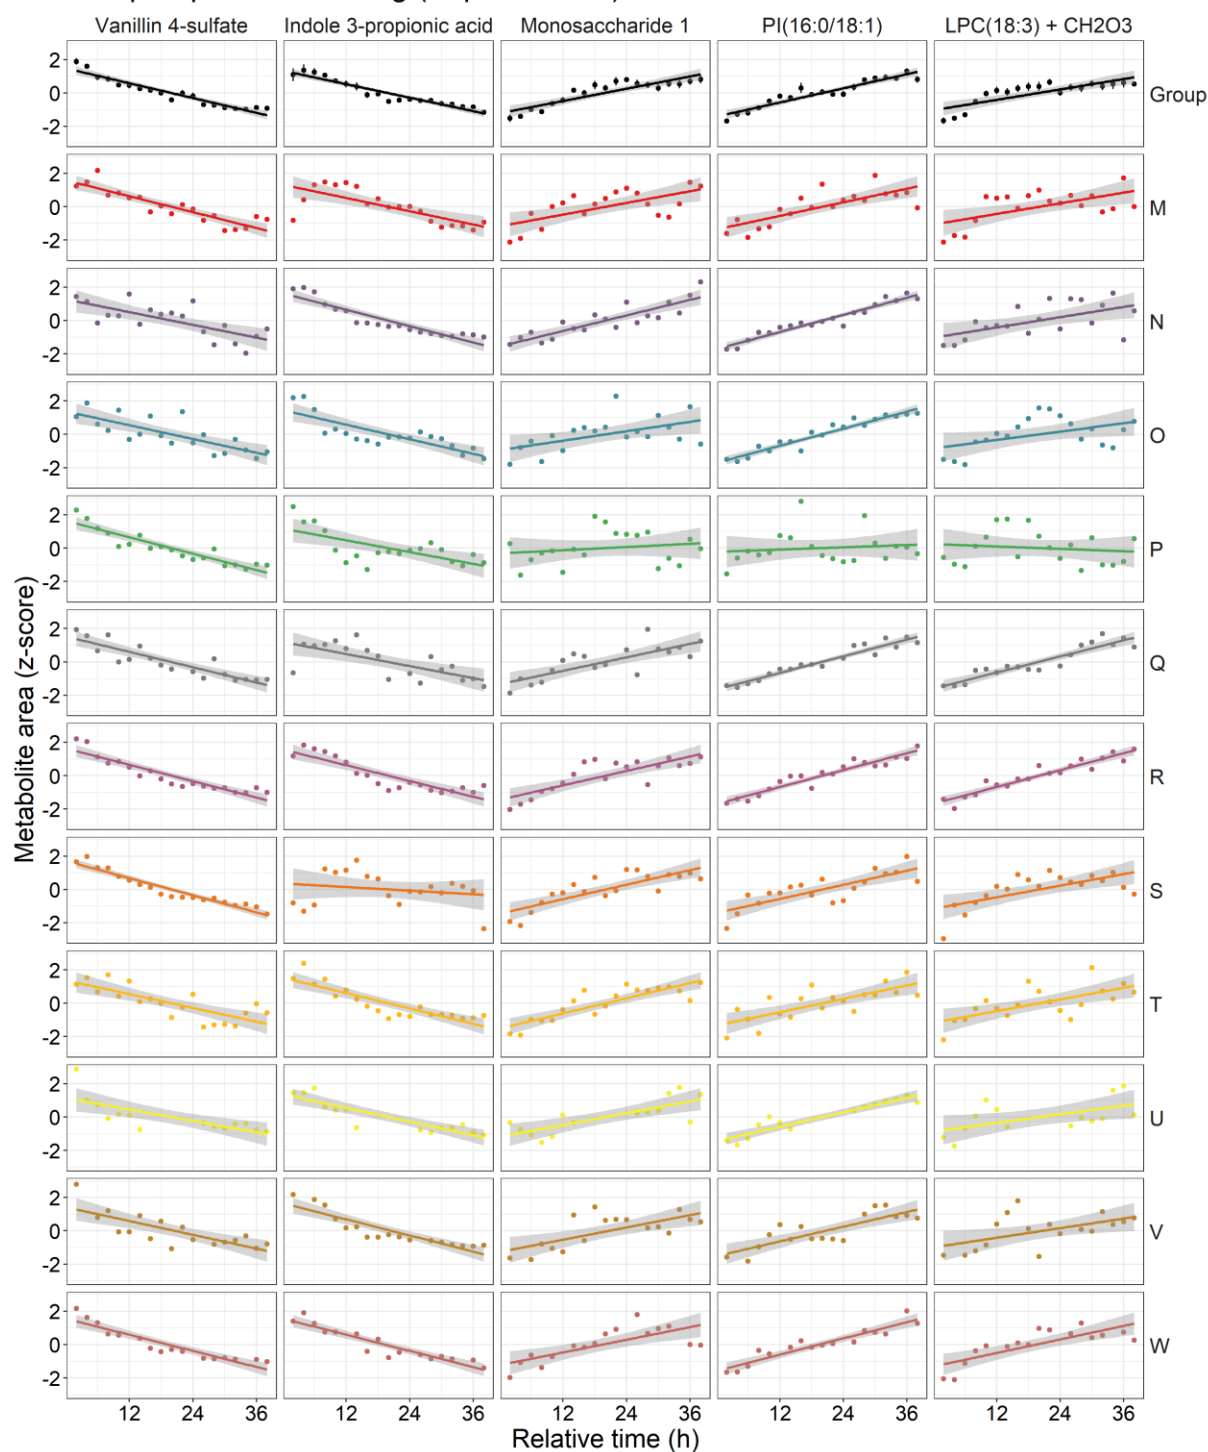

**Figure S4. Within-participant group and individual level trends of five consistently important metabolites across time since wake in Experiment 2 (sleep deprivation testing).** Displaying metabolite peak area (median normalised z-scored within participant) and linear fit with shaded 95% CI for each participant (M-W) and standard error bars for group points.

### Sleep deprivation training (Experiment 1)

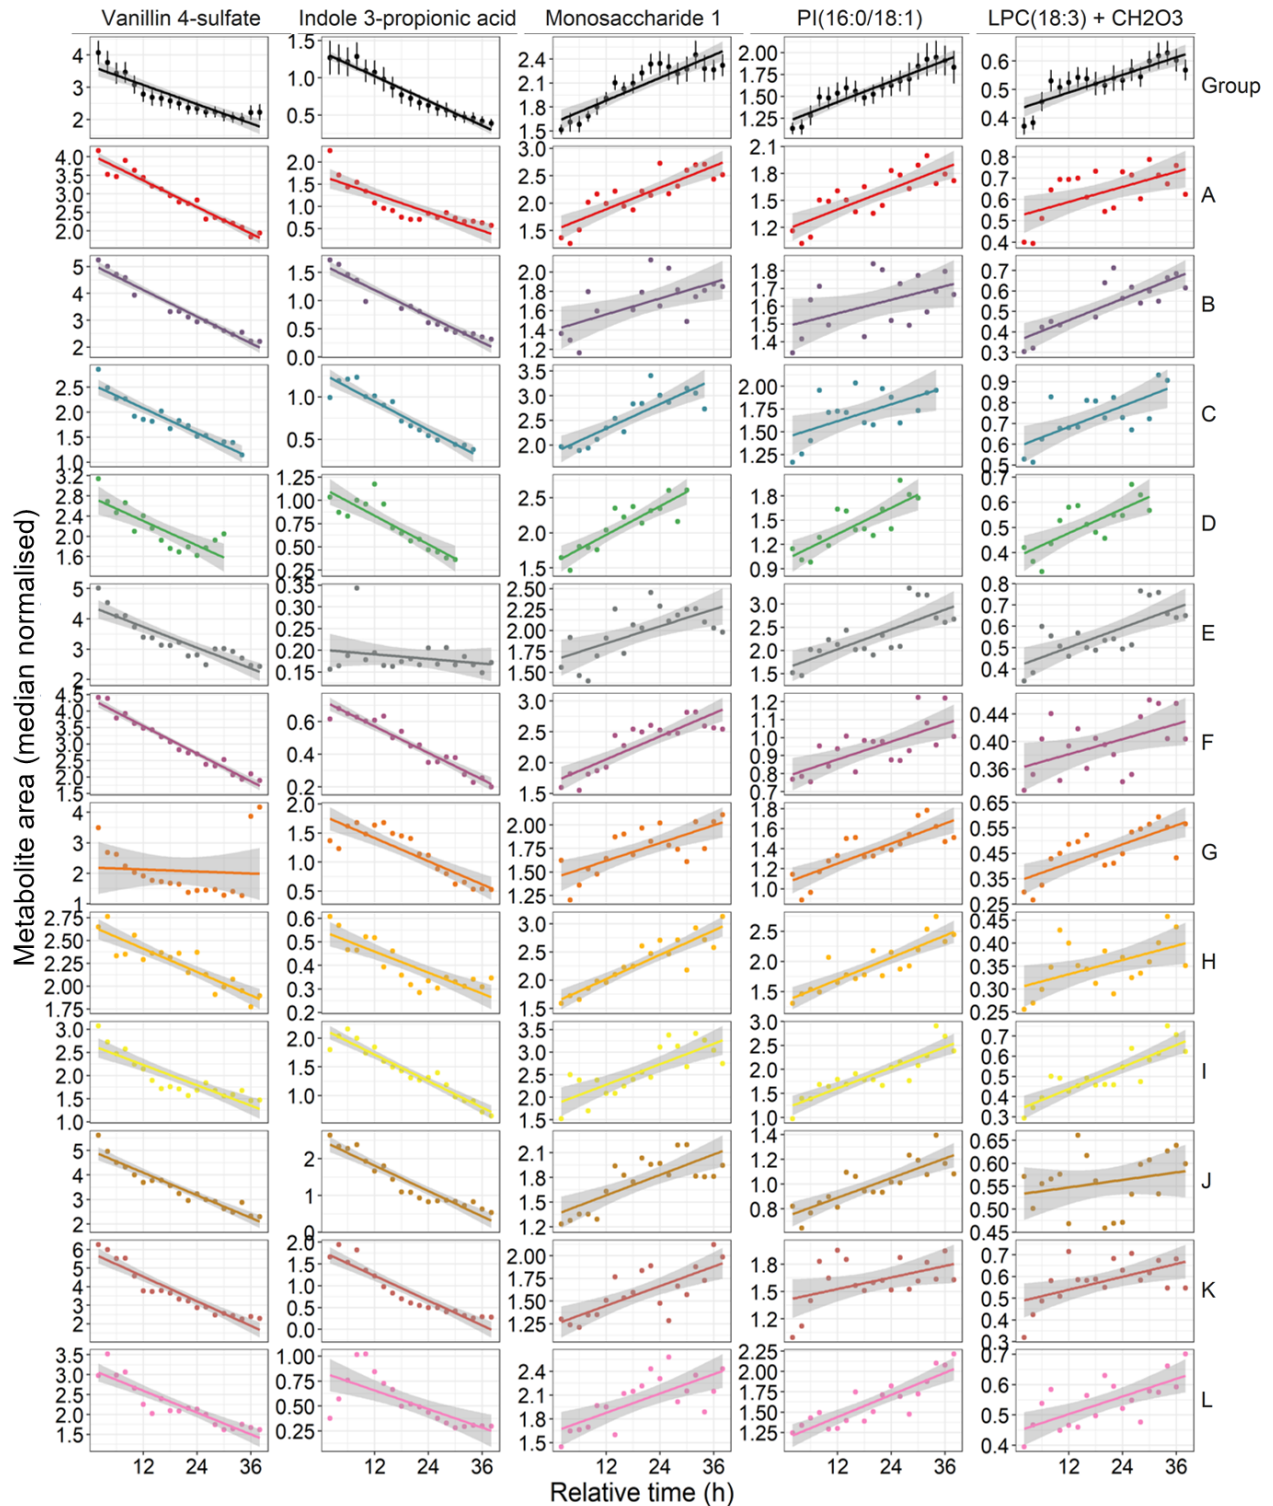

**Figure S5. Between-participants group and individual level trends of five consistently important metabolites across time since wake in Experiment 1 (sleep deprivation training).** Displaying metabolite peak area (median normalised) and linear fit with shaded 95% CI for each participant (A-L) and standard error bars for group points.



## Sleep deprivation testing (Experiment 2)

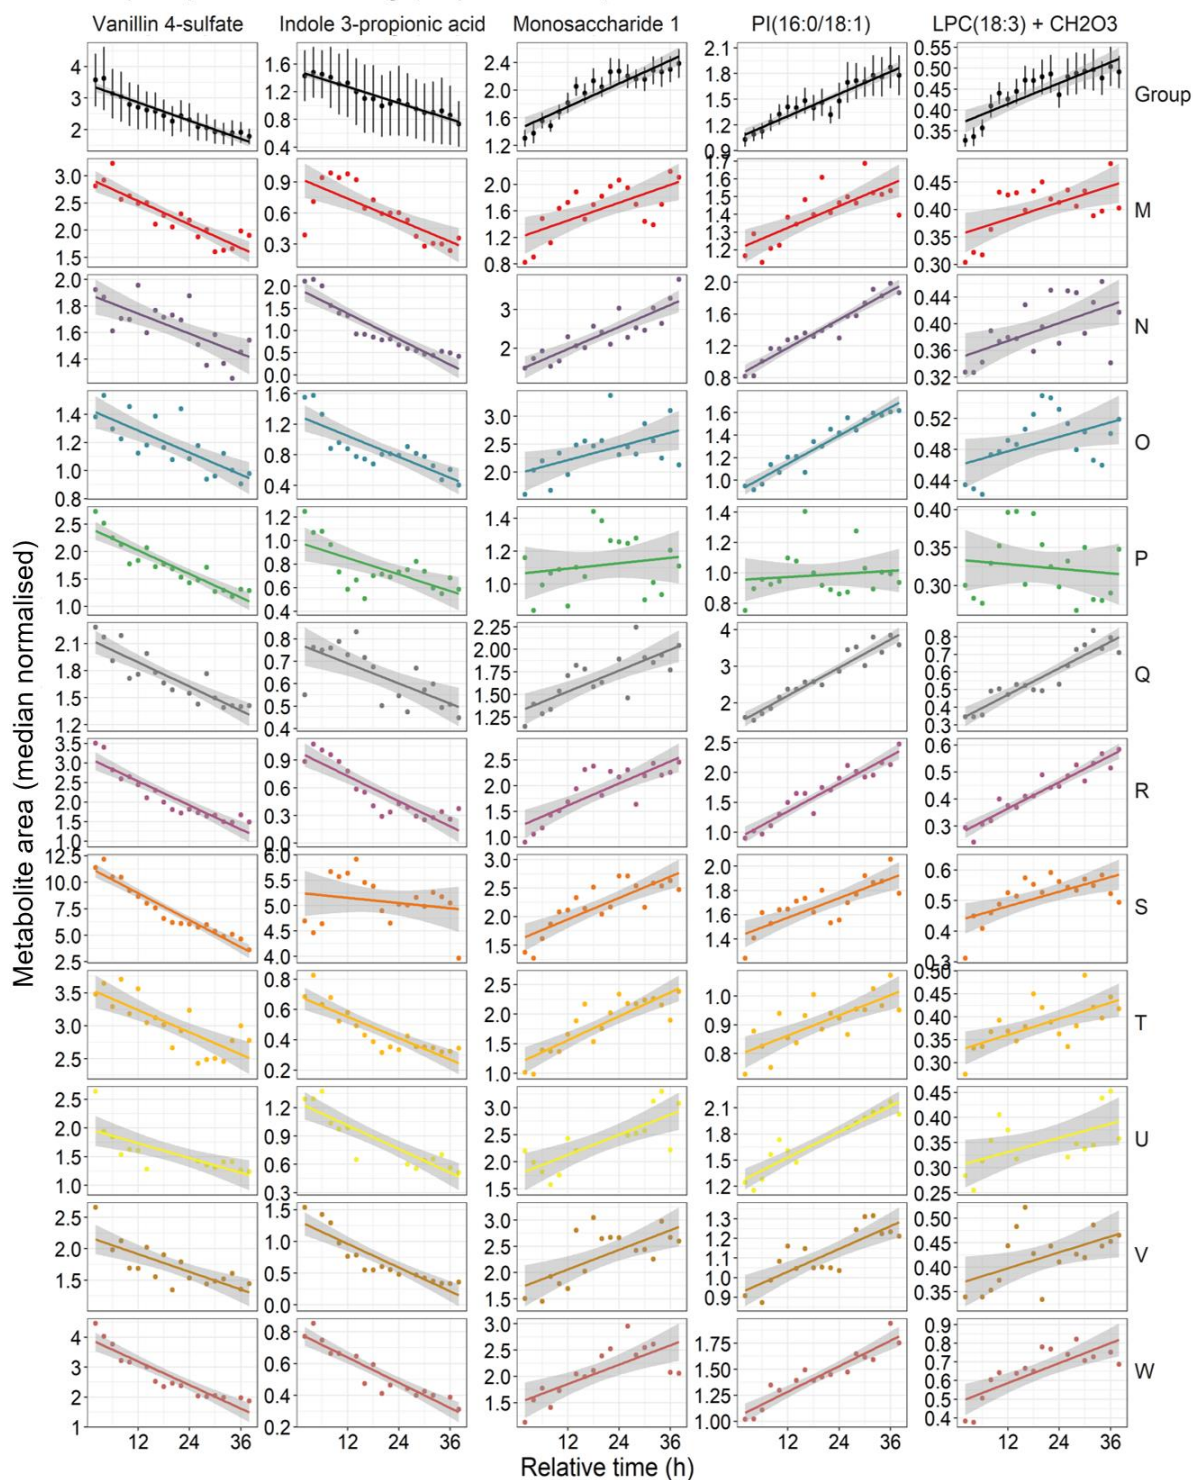

**Figure S6. Between-participants group and individual level trends of five consistently important metabolites across time since wake in Experiment 2 (sleep deprivation testing).** Displaying metabolite peak area (median normalised) and linear fit with shaded 95% CI for each participant (M-W) and standard error bars for group points.

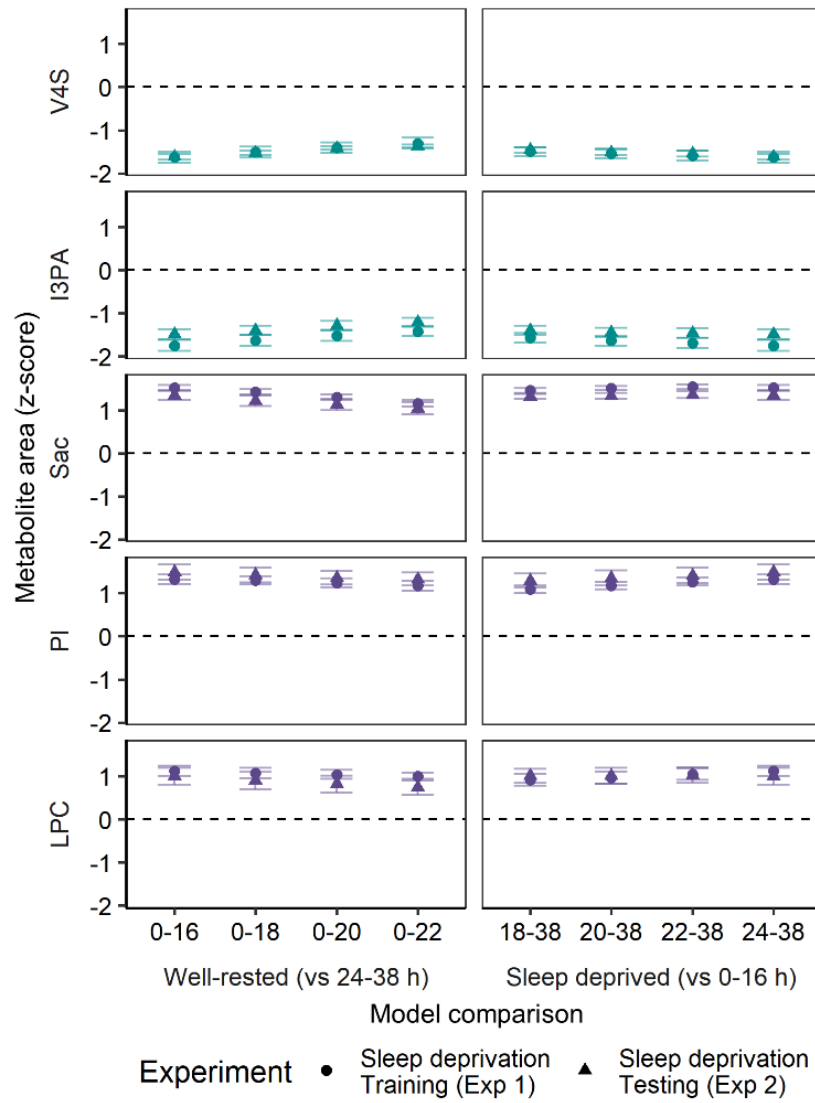

**Figure S7. Magnitude of change (expressed as a z-score) in metabolite features as a function of sleep deprivation.** *Left Panels:* Relative to sleep deprivation (24-38h), group level changes for varying levels of well-rested ranging from typical well-rested state (0-16h) to less conservative well-rested classifications. *Right Panels:* Relative to well-rested (0-16h), group level changes for varying levels of sleep deprivation thresholds ranging from 18hours and beyond to 24hours and beyond.



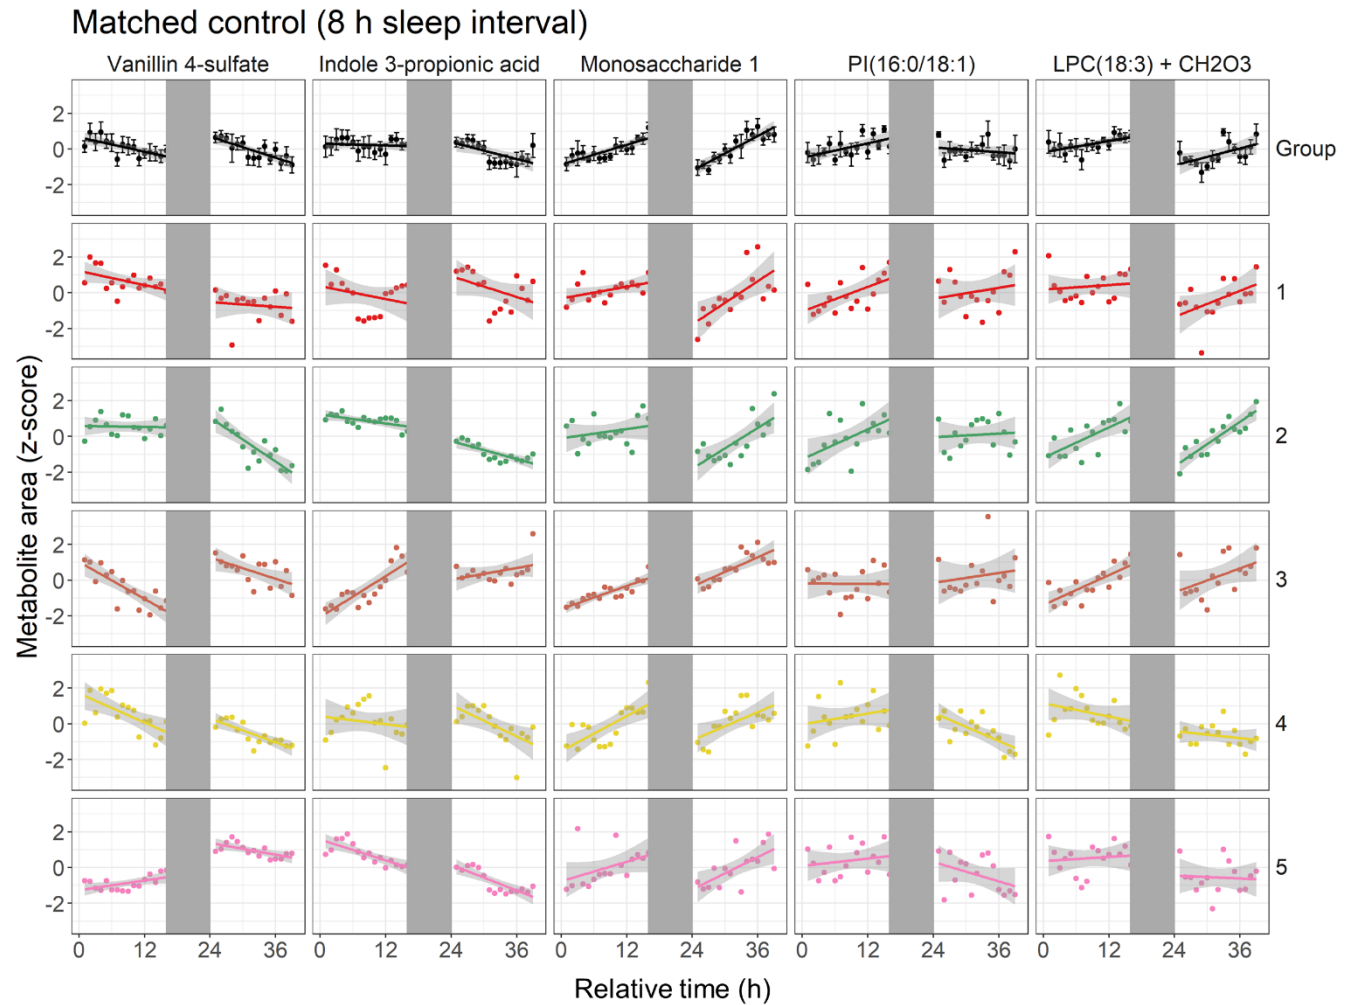

**Figure S8. Within-participant group and individual level trends of five consistently important metabolites across time since wake in Matched Control experiment.** Displaying metabolite peak area (median normalised z-scored within participant) and linear fit with shaded 95% CI for each participant (1-5) and standard error bars for group points. Grey band from 16 - 24 relative Time (h) indicates an 8 h sleep opportunity.

**Table S1.**

**Filtered HILIC LC-MS features included in predictive modelling. Including mass to charge ratio (m/z) and retention time (RT), calculated formulas, ppm difference between formula and candidate m/z, putative identified name, and level of identification reached as described by the metabolite standards initiative, features in bold were confirmed to level 1 identification using chemical standards.**

| Putative identified name   | Feature name            | m/z             | Accurate mass   | RT (min)    | Formula            | ppm         | Level    |
|----------------------------|-------------------------|-----------------|-----------------|-------------|--------------------|-------------|----------|
| <b>Vanillin 4-sulfate</b>  | <b>Unidentified_262</b> | <b>230.9955</b> | <b>232.0028</b> | <b>4.0</b>  | <b>C8H8SO6</b>     | <b>-5.9</b> | <b>1</b> |
| <b>Indole 3-propionate</b> | <b>Unidentified_181</b> | <b>188.0722</b> | <b>189.0795</b> | <b>7.3</b>  | <b>C11H11NO2</b>   | <b>2.5</b>  | <b>1</b> |
| Monosaccharide 1           | Unidentified_158        | 179.0561        | 180.0633        | 13.3        | C6H12O6            | -0.3        | 3        |
| <b>PI(16:0/18:1)</b>       | <b>Unidentified_906</b> | <b>835.5352</b> | <b>836.5425</b> | <b>3.3</b>  | <b>C43H81O13P</b>  | <b>1.2</b>  | <b>1</b> |
| (7S,8S)-DiHODE             | Unidentified_394        | 311.2221        | 312.2293        | 4.0         | C18H32O4           | -2.3        | 3        |
| <b>4-Pyridoxate</b>        | <b>Unidentified_165</b> | <b>182.0458</b> | <b>183.0531</b> | <b>4.5</b>  | <b>C8H9NO4</b>     | <b>-0.2</b> | <b>1</b> |
| pABA-Glc                   | Unidentified_368        | 298.0966        | 299.1039        | 13.7        | C13H17NO7          | 11.4        | 3        |
| <b>LPC(18:3) + CH2O3</b>   | <b>Unidentified_753</b> | <b>578.3101</b> | <b>579.3174</b> | <b>4.1</b>  | <b>C27H50NO10P</b> | <b>0.3</b>  | <b>1</b> |
| Indan-1-ol                 | Unidentified_86         | 133.0657        | 134.0729        | 3.9         | C9H10O             | -1.4        | 2        |
| Mercaptopropanoic acid +FA | Unidentified_112        | 151.0072        | 152.0144        | 12.2        | C4H8O4S            | -7.9        | 2        |
| Monosaccharide analogue 1  | Unidentified_135        | 165.0769        | 166.0841        | 12.7        | C6H14O5            | 0.2         | 3        |
| PS(O-20:0/22:6)            | Unidentified_919        | 848.5975        | 849.6048        | 3.5         | C48H84NO9P         | 19.3        | 3        |
| 2-Keto-glutamamate         | Unidentified_99         | 144.0303        | 145.0375        | 12.8        | C5H7NO4            | 0.1         | 2        |
| PI(36:1)                   | Unidentified_934        | 863.5627        | 864.5699        | 3.3         | C45H85O13P         | 3.6         | 3        |
| DGCC(20:5/20:5)            | Unidentified_935        | 864.5655        | 865.5728        | 3.3         | C50H77NO8          | 3.8         | 2        |
| <b>L-Proline</b>           | <b>X1.Proline</b>       | <b>114.0562</b> | <b>115.0635</b> | <b>14.6</b> | <b>C5H9NO2</b>     | <b>0</b>    | <b>1</b> |
| L-Proline C13              | Unidentified_58         | 115.0591        | 116.0664        | 14.6        | C5H9NO2(13C)       | 0           | 2        |
| PE(40:5)                   | Unidentified_879        | 792.5442        | 793.5514        | 3.5         | C45H80NO8P         | 2.6         | 3        |
| PE(40:5) C13               | Unidentified_880        | 793.5487        | 794.5560        | 3.5         | C45H80NO8P(13C)    | 1.9         | 3        |
| Monosaccharide 2           | Unidentified_222        | 209.0664        | 210.0736        | 13.9        | C7H14O7            | -1.4        | 3        |

**Table S2.**

**Results from regression (predicting time since wake) and classification (predicting clock time matched >24 h awake (0-16 h to 24-38 h awake)) random forest models for within-participant and between-participant analyses. Showing models trained on Experiment 1 (tested Experiment 2) and sanity checks (trained on Experiment 2 and tested on Experiment 1). Displaying the number of features used to build the models (all filtered features (20 or 13<sup>a</sup>), variables selected with the VSURF variable selection tool (various<sup>v</sup>), and the five final biomarker candidates (final<sup>f</sup>)). For regression models, variance explained (as R<sup>2</sup>) and root mean square error (RMSE) are displayed. For classification models, model accuracy (Lower – Upper 95% CI), Area Under the receiver operating Curve (AUC, Lower – Upper 95% CI), negative and positive prediction accuracy (NPV and PPV%), specificity (SP%) and sensitivity (SN%) are displayed.**

| Training Experiment | Comparison           | Model                 | Variables (Classification) | Tree depth (Regression) | R <sup>2</sup> (%) | RMSE | Variables (Classification) | Tree depth (Classification) | Accuracy (%) (Lower - Upper) | AUC (%) (Lower - Upper) | SP (%) | SN (%) | NPV (%) | PPV (%) |
|---------------------|----------------------|-----------------------|----------------------------|-------------------------|--------------------|------|----------------------------|-----------------------------|------------------------------|-------------------------|--------|--------|---------|---------|
| Experiment 1        | Within-participant   | Training <sup>a</sup> | 20                         | 171                     | 98.6               | 1.27 | 20                         | 35                          | 98.4 (95.3 - 99.7)           | 99.9 (99.7 - 100)       | 100    | 96.7   | 96.8    | 100     |
|                     |                      | Testing <sup>a</sup>  | 20                         |                         | 86.1               | 4.14 | 20                         |                             | 95.9 (91.7 - 98.3)           | 99.4 (98.7 - 100)       | 96.4   | 95.3   | 95.3    | 96.4    |
|                     |                      | Training <sup>v</sup> | 9                          | 173                     | 98.4               | 1.35 | 6                          | 35                          | 97.8 (94.5 - 99.4)           | 99.8 (99.4 - 100)       | 98.9   | 96.7   | 96.8    | 98.9    |
|                     |                      | Testing <sup>v</sup>  | 9                          |                         | 87.2               | 3.98 | 6                          |                             | 96.4 (92.4 - 98.7)           | 99.4 (98.7 - 100)       | 97.6   | 95.3   | 95.3    | 97.6    |
|                     |                      | Training <sup>f</sup> | 5                          | 159                     | 98.0               | 1.52 | 5                          | 35                          | 97.8 (94.5 - 99.4)           | 99.7 (99.3 - 100)       | 98.9   | 96.7   | 96.8    | 98.9    |
|                     |                      | Testing <sup>f</sup>  | 5                          |                         | 86.7               | 4.06 | 5                          |                             | 94.7 (90.1 - 97.5)           | 99.2 (98.3 - 100)       | 96.3   | 93.1   | 92.9    | 96.4    |
|                     | Between-participants | Training <sup>a</sup> | 20                         | 167                     | 96.5               | 2.03 | 20                         | 53                          | 95.1 (90.8 - 97.7)           | 98.6 (97.1 - 100)       | 96.7   | 93.5   | 93.5    | 96.6    |
|                     |                      | Testing <sup>a</sup>  | 20                         |                         | 32.6               | 9.12 | 20                         |                             | 72.8 (65.4 - 79.3)           | 88.4 (83.5 - 93.4)      | 67.3   | 83.9   | 89.4    | 56.0    |
|                     |                      | Training <sup>v</sup> | 13                         | 165                     | 96.6               | 2.01 | 14                         | 53                          | 95.1 (90.8 - 97.7)           | 98.9 (97.6 - 100)       | 95.7   | 94.4   | 94.6    | 95.5    |
|                     |                      | Testing <sup>v</sup>  | 13                         |                         | 39.3               | 8.66 | 14                         |                             | 72.2 (64.8 - 78.8)           | 90.1 (85.6 - 94.6)      | 67.0   | 82.5   | 88.2    | 56.0    |
|                     |                      | Training <sup>f</sup> | 5                          | 171                     | 94.0               | 2.66 | 5                          | 53                          | 92.9 (88.1 - 96.1)           | 97.7 (95.8 - 99.6)      | 94.4   | 91.3   | 91.4    | 94.4    |
|                     |                      | Testing <sup>f</sup>  | 5                          |                         | 48.2               | 8.00 | 5                          |                             | 79.3 (72.4 - 85.1)           | 89.1 (84.4 - 93.8)      | 76.0   | 83.6   | 85.9    | 72.6    |
| Experiment 2        | Within-participant   | Training <sup>a</sup> | 20                         | 157                     | 97.9               | 1.63 | 20                         | 33                          | 95.9 (91.7 - 98.3)           | 99.5 (99 - 100)         | 96.4   | 95.3   | 95.3    | 96.4    |
|                     |                      | Testing <sup>a</sup>  | 20                         |                         | 86.4               | 4.00 | 20                         |                             | 96.7 (93 - 98.8)             | 99.7 (99.3 - 100)       | 96.8   | 96.6   | 96.8    | 96.6    |
|                     |                      | Training <sup>v</sup> | 14                         | 155                     | 97.8               | 1.63 | 6                          | 31                          | 96.4 (92.4 - 98.7)           | 99 (97.8 - 100)         | 97.6   | 95.3   | 95.3    | 97.6    |
|                     |                      | Testing <sup>v</sup>  | 14                         |                         | 86.8               | 3.95 | 6                          |                             | 95.1 (90.8 - 97.7)           | 99.6 (99.1 - 100)       | 96.7   | 93.5   | 93.5    | 96.6    |
|                     |                      | Training <sup>f</sup> | 5                          | 145                     | 97.2               | 1.86 | 5                          | 31                          | 96.4 (92.4 - 98.7)           | 99.5 (98.8 - 100)       | 97.6   | 95.3   | 95.3    | 97.6    |
|                     |                      | Testing <sup>f</sup>  | 5                          |                         | 89.6               | 3.49 | 5                          |                             | 97.8 (94.5 - 99.4)           | 99.7 (99.3 - 100)       | 100    | 95.7   | 95.7    | 100     |
|                     | Between-participants | Training <sup>a</sup> | 13                         | 147                     | 95.8               | 2.28 | 13                         | 55                          | 91.7 (86.5 - 95.4)           | 97.8 (96 - 99.6)        | 91.8   | 91.7   | 91.8    | 91.7    |
|                     |                      | Testing <sup>a</sup>  | 13                         |                         | 46.3               | 7.95 | 13                         |                             | 84.6 (78.5 - 89.5)           | 89.5 (84.4 - 94.7)      | 83.5   | 85.9   | 87.1    | 82.0    |
|                     |                      | Training <sup>v</sup> | 7                          | 147                     | 95.8               | 2.29 | 8                          | 55                          | 91.7 (86.5 - 95.4)           | 97.9 (96.2 - 99.6)      | 92.8   | 90.7   | 90.6    | 92.9    |
|                     |                      | Testing <sup>v</sup>  | 7                          |                         | 42.5               | 8.23 | 8                          |                             | 79.1 (72.5 - 84.8)           | 88.2 (82.9 - 93.5)      | 75.7   | 84.0   | 87.1    | 70.8    |
|                     |                      | Training <sup>f</sup> | 5                          | 145                     | 94.4               | 2.62 | 5                          | 51                          | 91.1 (85.8 - 94.9)           | 96.9 (94.6 - 99.2)      | 93.8   | 88.8   | 88.2    | 94.0    |
|                     |                      | Testing <sup>f</sup>  | 5                          |                         | 52.7               | 7.46 | 5                          |                             | 80.8 (74.3 - 86.2)           | 90.7 (86.6 - 94.9)      | 81.5   | 80.0   | 80.6    | 80.9    |

**Table S3.**

**Results from sanity check analysis (trained on Experiment 2 and tested on Experiment 1) for group and individual level regression (predicting time since wake) and classification (predicting clock matched >24 h awake (0-16 h to 24-38 h TSW)) random forest models for within-participant and between-participant analyses built with the five final biomarker candidates. For regression models, variance explained (as R<sup>2</sup>) and root mean square error (RMSE) are displayed (Tree depth was 145, for both within-participant and between participants regression training models). For classification models, model accuracy (Lower – Upper 95% CI), Area Under the receiver operating Curve (AUC, Lower – Upper 95% CI), negative and positive prediction accuracy (NPV and PPV%), specificity (SP%) and sensitivity (SN%) are displayed (Tree depth was 31 and 51, for within-participant and between participants classification training models, respectively). Note if PPV or NPV are 0 SN and SP cannot be calculated.**

| Comparison           | Model              | Participant     | Accuracy (%)<br>(Lower - Upper) | AUC (%)<br>(Lower - Upper) | SP<br>(%)          | SN<br>(%) | NPV<br>(%) | PPV<br>(%) | R <sup>2</sup><br>(%) | RMSE  |
|----------------------|--------------------|-----------------|---------------------------------|----------------------------|--------------------|-----------|------------|------------|-----------------------|-------|
| Within-participant   | Training           | Group           | 96.4 (92.4 - 98.7)              | 99.5 (98.8 - 100)          | 97.6               | 95.3      | 95.3       | 97.6       | 97.2                  | 1.86  |
|                      |                    | Testing         | Group                           | 97.8 (94.5 - 99.4)         | 99.7 (99.3 - 100)  | 100       | 95.7       | 95.7       | 100                   | 89.6  |
|                      | Testing            | A               | 100 (79.4 - 100)                | 100 (100 - 100)            | 100                | 100       | 100        | 100        | 93.7                  | 2.74  |
|                      |                    | B               | 100 (75.3 - 100)                | 100 (100 - 100)            | 100                | 100       | 100        | 100        | 86.1                  | 4.31  |
|                      |                    | C               | 100 (75.3 - 100)                | 100 (100 - 100)            | 100                | 100       | 100        | 100        | 86.1                  | 3.65  |
|                      |                    | D               | 91.7 (61.5 - 99.8)              | 100 (100 - 100)            | 100                | 80.0      | 87.5       | 100        | 66.6                  | 4.99  |
|                      |                    | E               | 100 (79.4 - 100)                | 100 (100 - 100)            | 100                | 100       | 100        | 100        | 86.8                  | 3.98  |
|                      |                    | F               | 100 (79.4 - 100)                | 100 (100 - 100)            | 100                | 100       | 100        | 100        | 94.3                  | 2.61  |
|                      |                    | G               | 87.5 (61.7 - 98.4)              | 96.9 (89.6 - 100)          | 100                | 80.0      | 75.0       | 100        | 78.4                  | 5.09  |
|                      |                    | H               | 100 (79.4 - 100)                | 100 (100 - 100)            | 100                | 100       | 100        | 100        | 95.5                  | 2.33  |
|                      |                    | I               | 100 (79.4 - 100)                | 100 (100 - 100)            | 100                | 100       | 100        | 100        | 96.3                  | 2.11  |
|                      |                    | J               | 100 (79.4 - 100)                | 100 (100 - 100)            | 100                | 100       | 100        | 100        | 92.3                  | 3.05  |
|                      |                    | K               | 93.8 (69.8 - 99.8)              | 98.4 (94.1 - 100)          | 100                | 88.9      | 87.5       | 100        | 89.1                  | 3.62  |
| L                    | 100 (79.4 - 100)   | 100 (100 - 100) | 100                             | 100                        | 100                | 100       | 96.3       | 2.11       |                       |       |
| Between-participants | Training           | Group           | 91.1 (85.8 - 94.9)              | 96.9 (94.6 - 99.2)         | 93.8               | 88.8      | 88.2       | 94.0       | 94.4                  | 2.62  |
|                      |                    | Testing         | Group                           | 80.8 (74.3 - 86.2)         | 90.7 (86.6 - 94.9) | 81.5      | 80.0       | 80.6       | 80.9                  | 52.7  |
|                      | Testing            | A               | 100 (79.4 - 100)                | 100 (100 - 100)            | 100                | 100       | 100        | 100        | 68.5                  | 6.15  |
|                      |                    | B               | 69.2 (38.6 - 90.9)              | 100 (100 - 100)            | 55.6               | 100       | 100        | 50.0       | 51.6                  | 8.05  |
|                      |                    | C               | 76.9 (46.2 - 95)                | 100 (100 - 100)            | 100                | 62.5      | 62.5       | 100        | 31.6                  | 8.08  |
|                      |                    | D               | 91.7 (61.5 - 99.8)              | 100 (100 - 100)            | 100                | 80.0      | 87.5       | 100        | 81.3                  | 3.74  |
|                      |                    | E               | 50 (24.7 - 75.3)                | 92.2 (76.2 - 100)          |                    |           | 0.0        | 100        | 4.4                   | 10.71 |
|                      |                    | F               | 100 (79.4 - 100)                | 100 (100 - 100)            | 100                | 100       | 100        | 100        | 83.0                  | 4.51  |
|                      |                    | G               | 68.8 (41.3 - 89)                | 98.4 (94.1 - 100)          | 61.5               | 100       | 100        | 37.5       | 52.5                  | 7.55  |
|                      |                    | H               | 87.5 (61.7 - 98.4)              | 100 (100 - 100)            | 100                | 80.0      | 75.0       | 100        | 57.6                  | 7.13  |
|                      |                    | I               | 93.8 (69.8 - 99.8)              | 100 (100 - 100)            | 100                | 88.9      | 87.5       | 100        | 70.9                  | 5.91  |
|                      |                    | J               | 50 (24.7 - 75.3)                | 43.8 (12.3 - 75.2)         | 50.0               |           | 100        | 0.0        | -14.5                 | 11.72 |
|                      |                    | K               | 87.5 (61.7 - 98.4)              | 100 (100 - 100)            | 80.0               | 100       | 100        | 75.0       | 69.3                  | 6.07  |
| L                    | 93.8 (69.8 - 99.8) | 100 (100 - 100) | 100                             | 88.9                       | 87.5               | 100       | 69.4       | 6.06       |                       |       |

**Table S4.**

**Testing model results from classification random forests for within and between-participant analyses. Showing models trained on Experiment 1 and tested Experiment 2 and sanity checks (trained on Experiment 2 and tested on Experiment 1). Classification models predicting clock matched >24 h awake were built and tested closing the distinction between well-rested and sleep deprived classification by altering the Time grouping (h). Models were built with the five consistent features across VSURF selected models. Model accuracy (Lower – Upper 95% CI), Area Under the receiver operating Curve (AUC, Lower – Upper 95% CI), negative and positive prediction accuracy (NPV and PPV%), specificity (SP%) and sensitivity (SN%) are displayed. For the training models tested here, tree depth ranged from 27-73 nodes).**

| Training Experiment  | Comparison           | Time grouping (h) | Accuracy (%) (Lower - Upper) | AUC (%) (Lower - Upper) | SP (%)             | SN (%)             | NPV (%) | PPV (%) |      |      |
|----------------------|----------------------|-------------------|------------------------------|-------------------------|--------------------|--------------------|---------|---------|------|------|
| Experiment 1         | Within-participant   | 0-16 vs 18-38     | 92.4 (87.8 - 95.7)           | 98 (96.6 - 99.4)        | 91.7               | 93.0               | 90.6    | 93.8    |      |      |
|                      |                      | 0-16 vs 20-38     | 93.6 (89.1 - 96.7)           | 98.9 (98.1 - 99.8)      | 92.9               | 94.2               | 92.9    | 94.2    |      |      |
|                      |                      | 0-16 vs 22-38     | 93.8 (89.2 - 96.9)           | 98.8 (97.9 - 99.8)      | 93.0               | 94.6               | 94.1    | 93.5    |      |      |
|                      |                      | 0-18 vs 24-38     | 96.6 (92.8 - 98.8)           | 99.1 (98.1 - 100)       | 98.9               | 94.3               | 94.7    | 98.8    |      |      |
|                      |                      | 0-20 vs 24-38     | 92.1 (87.2 - 95.5)           | 97.9 (96.3 - 99.5)      | 95.0               | 88.8               | 90.5    | 94.0    |      |      |
|                      |                      | 0-23 vs 24-38     | 90.4 (85.4 - 94.1)           | 96.5 (94.2 - 98.7)      | 90.6               | 90.1               | 93.0    | 86.9    |      |      |
|                      | Between-participants | 0-16 vs 18-38     | 70.2 (63.3 - 76.5)           | 84.7 (79.4 - 90)        | 64.8               | 74.5               | 67.1    | 72.6    |      |      |
|                      |                      | 0-16 vs 20-38     | 72.3 (65.4 - 78.6)           | 85.8 (80.6 - 91)        | 67.7               | 76.8               | 74.1    | 70.9    |      |      |
|                      |                      | 0-16 vs 22-38     | 75.3 (68.3 - 81.4)           | 87.6 (82.7 - 92.5)      | 71.1               | 80.2               | 81.2    | 69.9    |      |      |
|                      |                      | 0-18 vs 24-38     | 78.2 (71.4 - 84)             | 88.4 (83.7 - 93.1)      | 76.9               | 80.0               | 84.2    | 71.4    |      |      |
|                      |                      | 0-20 vs 24-38     | 77.2 (70.6 - 83)             | 88.1 (83.5 - 92.7)      | 78.7               | 75.3               | 81.0    | 72.6    |      |      |
|                      |                      | 0-23 vs 24-38     | 76.8 (70.3 - 82.5)           | 87.4 (82.8 - 92.1)      | 79.3               | 73.2               | 80.7    | 71.4    |      |      |
|                      |                      | Experiment 2      | Within-participant           | 0-16 vs 18-38           | 93.6 (89.5 - 96.4) | 98.7 (97.6 - 99.8) | 92.5    | 94.4    | 92.5 | 94.4 |
|                      |                      |                   |                              | 0-16 vs 20-38           | 96.1 (92.5 - 98.3) | 99.5 (98.8 - 100)  | 96.7    | 95.7    | 94.6 | 97.3 |
| 0-16 vs 22-38        | 96.9 (93.4 - 98.9)   |                   |                              | 99.7 (99.2 - 100)       | 98.9               | 95.2               | 94.6    | 99.0    |      |      |
| 0-18 vs 24-38        | 95.9 (92 - 98.2)     |                   |                              | 99.3 (98.6 - 100)       | 98.0               | 93.5               | 94.3    | 97.8    |      |      |
| 0-20 vs 24-38        | 93.7 (89.5 - 96.6)   |                   |                              | 98.9 (98 - 99.8)        | 95.6               | 91.3               | 93.2    | 94.4    |      |      |
| Between-participants | 0-23 vs 24-38        |                   | 90.4 (85.7 - 93.9)           | 96.6 (94.7 - 98.6)      | 92.9               | 87.0               | 90.7    | 89.9    |      |      |
|                      | 0-16 vs 18-38        |                   | 76.1 (69.9 - 81.6)           | 86.7 (82.2 - 91.3)      | 72.0               | 79.2               | 72.0    | 79.2    |      |      |
|                      | 0-16 vs 20-38        |                   | 77.2 (70.8 - 82.7)           | 88.3 (84 - 92.7)        | 75.0               | 78.9               | 74.2    | 79.6    |      |      |
|                      | 0-16 vs 22-38        |                   | 77.8 (71.3 - 83.5)           | 89.6 (85.4 - 93.8)      | 77.2               | 78.4               | 76.3    | 79.2    |      |      |
|                      | 0-18 vs 24-38        |                   | 78.4 (71.9 - 83.9)           | 89 (84.4 - 93.6)        | 79.4               | 77.0               | 81.0    | 75.3    |      |      |
|                      |                      | 0-20 vs 24-38     | 77.7 (71.4 - 83.2)           | 86 (81 - 91.1)          | 78.9               | 75.9               | 82.9    | 70.8    |      |      |
|                      |                      | 0-23 vs 24-38     | 77.5 (71.4 - 82.9)           | 84.6 (79.3 - 89.9)      | 80.3               | 73.3               | 82.2    | 70.8    |      |      |

**Table S5.**

Testing model results from classification random forest models for within- and between-participants analyses. Showing models trained on Experiment 1 and tested Experiment 2 and sanity checks (trained on Experiment 2 and tested on Experiment 1). Classification models predicting well-rested (0-16 h TSW) vs stepwise biological night classifications (time grouping) for the sleep deprived group. Models were built with the five consistent variables across VSURF selected models). Model accuracy (Lower – Upper 95% CI), Area Under the receiver operating Curve (AUC, Lower – Upper 95% CI), negative and positive prediction accuracy (NPV and PPV%), specificity (SP%) and sensitivity (SN%) are displayed. For the training models tested here, tree depth ranged from 19 to 57 nodes).

| Training Experiment | Comparison           | Time grouping (h) | Accuracy (%) (Lower - Upper) | AUC (%) (Lower - Upper) | SP (%) | SN (%) | NPV (%) | PPV (%) |
|---------------------|----------------------|-------------------|------------------------------|-------------------------|--------|--------|---------|---------|
| Experiment 1        | Within-participant   | 0-16 vs 18-24     | 84.6 (76.9 - 90.4)           | 95.1 (91.8 - 98.4)      | 89.3   | 74.4   | 88.2    | 76.3    |
|                     |                      | 0-16 vs 20-24     | 91.2 (84.3 - 95.7)           | 97.5 (95.3 - 99.8)      | 94.1   | 82.1   | 94.1    | 82.1    |
|                     |                      | 0-16 vs 22-24     | 93.2 (86.5 - 97.2)           | 97.6 (95.2 - 100)       | 95.3   | 82.4   | 96.5    | 77.8    |
|                     |                      | 0-16 vs 24        | 96.8 (91 - 99.3)             | 98.7 (96.8 - 100)       | 97.7   | 87.5   | 98.8    | 77.8    |
|                     | Between-participants | 0-16 vs 18-24     | 69.1 (60.1 - 77.1)           | 76.9 (68.2 - 85.5)      | 81.3   | 50.0   | 71.8    | 63.2    |
|                     |                      | 0-16 vs 20-24     | 73.5 (64.3 - 81.3)           | 79.1 (70.1 - 88.1)      | 84.8   | 47.1   | 78.8    | 57.1    |
|                     |                      | 0-16 vs 22-24     | 78.6 (69.5 - 86.1)           | 80.2 (69.6 - 90.7)      | 89.9   | 41.7   | 83.5    | 55.6    |
| Experiment 2        | Within-participant   | 0-16 vs 24        | 80.9 (71.4 - 88.2)           | 83.5 (72.2 - 94.7)      | 94.7   | 26.3   | 83.5    | 55.6    |
|                     |                      | 0-16 vs 18-24     | 89.4 (83.1 - 93.9)           | 96.9 (94.4 - 99.4)      | 89.0   | 90.2   | 95.7    | 77.1    |
|                     |                      | 0-16 vs 20-24     | 93 (87.2 - 96.8)             | 98.5 (96.9 - 100)       | 92.9   | 93.5   | 97.8    | 80.6    |
|                     |                      | 0-16 vs 22-24     | 93.2 (87 - 97)               | 98.5 (96.9 - 100)       | 93.8   | 90.0   | 97.8    | 75.0    |
|                     | Between-participants | 0-16 vs 24        | 94.3 (88 - 97.9)             | 99.3 (98.1 - 100)       | 94.8   | 87.5   | 98.9    | 58.3    |
|                     |                      | 0-16 vs 18-24     | 74.5 (66.4 - 81.4)           | 78.4 (70.2 - 86.7)      | 80.6   | 62.5   | 80.6    | 62.5    |
|                     |                      | 0-16 vs 20-24     | 79.8 (71.9 - 86.4)           | 80.7 (71.8 - 89.7)      | 84.5   | 65.6   | 88.2    | 58.3    |
|                     |                      | 0-16 vs 22-24     | 86.3 (78.7 - 92)             | 82.2 (72.3 - 92.1)      | 90.5   | 68.2   | 92.5    | 62.5    |
|                     |                      | 0-16 vs 24        | 93.3 (86.7 - 97.3)           | 81.7 (65.2 - 98.3)      | 94.8   | 77.8   | 97.8    | 58.3    |



**Table S6.**

**Results from regression (predicting time since wake) and classification (predicting clock matched >24 h awake (0-16 h to 24-38 h awake)) random forest models for within-participant and between-participant analyses using subset variables from the final biomarker. Showing models trained on Experiment 1 (tested Experiment 2). Displaying the number of features used to build the models. For classification models, model accuracy (Lower – Upper 95% CI), Area Under the receiver operating Curve (AUC, Lower – Upper 95% CI), negative and positive prediction accuracy (NPV and PPV%), specificity (SP%) sensitivity (SN%) and Bonferroni corrected p-values are displayed. For regression models, variance explained (as R<sup>2</sup>) and root mean squared error (RMSE) are displayed. Metabolites are abbreviated as: V4S: vanillin 4-sulfate, I3PA: indole 3-propionate, Sac: monosaccharide 1, PI: PI(16:0/18:1) and LPC: LPC(18:3). For the training models tested here, tree depth ranged from 25 to 101 nodes).**

| Comparison           | Reduced candidates | Variables           | Accuracy (%)<br>(Lower - Upper) | AUC (%)<br>(Lower - Upper) | SP<br>(%) | SN<br>(%) | NPV<br>(%) | PPV<br>(%) | adjusted<br>p-value | R <sup>2</sup><br>(%) | RMSE |
|----------------------|--------------------|---------------------|---------------------------------|----------------------------|-----------|-----------|------------|------------|---------------------|-----------------------|------|
| Within-participant   | Final biomarker    | 5                   | 94.7% (90.1 - 97.5)             | 99.2 (98.3 - 100)          | 96.3      | 93.1      | 92.9       | 96.4       | <0.001              | 86.3                  | 4.1  |
|                      | No LPC             | 4                   | 96.4% (92.4 - 98.7)             | 99.1 (98.2 - 100)          | 96.5      | 96.4      | 96.5       | 96.4       | <0.001              | 84.6                  | 4.4  |
|                      | No PI              | 4                   | 96.4% (92.4 - 98.7)             | 99.2 (98.4 - 100)          | 97.6      | 95.3      | 95.3       | 97.6       | <0.001              | 88.1                  | 3.8  |
|                      | No Sac             | 4                   | 92.3% (87.2 - 95.8)             | 98.3 (97 - 99.6)           | 91.9      | 92.8      | 92.9       | 91.7       | <0.001              | 83.1                  | 4.6  |
|                      | No I3PA            | 4                   | 97.6% (94.1 - 99.4)             | 99.8 (99.4 - 100)          | 97.6      | 97.6      | 97.6       | 97.6       | <0.001              | 84.8                  | 4.3  |
|                      | No V4S             | 4                   | 89.3% (83.7 - 93.6)             | 97.7 (96.2 - 99.3)         | 92.4      | 86.7      | 85.9       | 92.9       | <0.001              | 80.2                  | 4.9  |
|                      | No LPC, No PI      | 3                   | 96.4% (92.4 - 98.7)             | 99.3 (98.3 - 100)          | 96.5      | 96.4      | 96.5       | 96.4       | <0.001              | 84.9                  | 4.3  |
|                      | No Sac, No LPC     | 3                   | 92.9% (87.9 - 96.3)             | 98.4 (97.1 - 99.7)         | 92.0      | 93.9      | 94.1       | 91.7       | <0.001              | 83.3                  | 4.5  |
|                      | No Sac, No PI      | 3                   | 92.9% (87.9 - 96.3)             | 97.6 (95.7 - 99.4)         | 92.9      | 92.9      | 92.9       | 92.9       | <0.001              | 80.0                  | 5.0  |
|                      | No Sac, No I3PA    | 3                   | 95.3% (90.9 - 97.9)             | 98.7 (97.4 - 100)          | 93.3      | 97.5      | 97.6       | 92.9       | <0.001              | 80.7                  | 4.9  |
|                      | No Sac, No V4S     | 3                   | 87.6% (81.6 - 92.1)             | 95.5 (92.7 - 98.3)         | 86.4      | 88.9      | 89.4       | 85.7       | <0.001              | 75.6                  | 5.5  |
|                      | No I3PA, No LPC    | 3                   | 97.6% (94.1 - 99.4)             | 99.8 (99.6 - 100)          | 96.6      | 98.8      | 98.8       | 96.4       | <0.001              | 86.4                  | 4.1  |
|                      | No I3PA, No PI     | 3                   | 95.9% (91.7 - 98.3)             | 99.4 (98.8 - 100)          | 95.3      | 96.4      | 96.5       | 95.2       | <0.001              | 82.0                  | 4.7  |
|                      | No V4S, No LPC     | 3                   | 89.9% (84.4 - 94)               | 97.8 (96.2 - 99.4)         | 92.5      | 87.6      | 87.1       | 92.9       | <0.001              | 81.8                  | 4.7  |
|                      | No V4S, No PI      | 3                   | 91.1% (85.8 - 94.9)             | 97.2 (95.3 - 99.1)         | 93.8      | 88.8      | 88.2       | 94.0       | <0.001              | 75.7                  | 5.5  |
|                      | No I3PA, No VS4    | 3                   | 85.8% (79.6 - 90.7)             | 92.5 (88.6 - 96.4)         | 88.6      | 83.3      | 82.4       | 89.3       | <0.001              | 68.2                  | 6.3  |
|                      | Only I3PA and V4S  | 2                   | 89.9% (84.4 - 94)               | 96.6 (94.2 - 99)           | 92.5      | 87.6      | 87.1       | 92.9       | <0.001              | 75.0                  | 5.6  |
|                      | Only V4S and PI    | 2                   | 93.5% (88.7 - 96.7)             | 98.8 (97.8 - 99.9)         | 92.0      | 95.1      | 95.3       | 91.7       | <0.001              | 80.6                  | 4.9  |
|                      | Only IPA and PI    | 2                   | 88.8% (83 - 93.1)               | 94.8 (91.4 - 98.2)         | 88.4      | 89.2      | 89.4       | 88.1       | <0.001              | 75.9                  | 5.5  |
|                      | Only Sac and PI    | 2                   | 82.2% (75.6 - 87.7)             | 92.2 (88.4 - 96)           | 84.0      | 80.7      | 80.0       | 84.5       | <0.001              | 68.8                  | 6.2  |
| Only LPC and PI      | 2                  | 78.7% (71.7 - 84.6) | 87.9 (83 - 92.8)                | 81.0                       | 76.7      | 75.3      | 82.1       | <0.001     | 56.5                | 7.3                   |      |
| Only Sac and V4S     | 2                  | 96.4% (92.4 - 98.7) | 99.4 (98.6 - 100)               | 95.4                       | 97.6      | 97.6      | 95.2       | <0.001     | 81.9                | 4.7                   |      |
| Only LPC and VS4     | 2                  | 92.3% (87.2 - 95.8) | 97.3 (95.2 - 99.5)              | 89.1                       | 96.1      | 96.5      | 88.1       | <0.001     | 76.0                | 5.4                   |      |
| Only Sac and I3PA    | 2                  | 92.9% (87.9 - 96.3) | 97.3 (95.4 - 99.3)              | 95.1                       | 90.9      | 90.6      | 95.2       | <0.001     | 74.9                | 5.6                   |      |
| Only I3PA and LPC    | 2                  | 83.4% (77 - 88.7)   | 92.8 (89 - 96.6)                | 82.0                       | 85.0      | 85.9      | 81.0       | <0.001     | 65.0                | 6.6                   |      |
| Only Sac and LPC     | 2                  | 83.4% (77 - 88.7)   | 90.3 (85.5 - 95)                | 87.0                       | 80.4      | 78.8      | 88.1       | <0.001     | 53.3                | 7.6                   |      |
| Between-participants | Final biomarker    | 5                   | 79.3% (72.4 - 85.1)             | 89.1 (84.4 - 93.8)         | 76.0      | 83.6      | 85.9       | 72.6       | <0.001              | 45.8                  | 8.2  |
|                      | No LPC             | 4                   | 78.1% (71.1 - 84.1)             | 89.4 (84.8 - 94)           | 75.5      | 81.3      | 83.5       | 72.6       | <0.001              | 47.0                  | 8.1  |
|                      | No PI              | 4                   | 76.3% (69.2 - 82.5)             | 89.9 (85.5 - 94.4)         | 79.2      | 73.9      | 71.8       | 81.0       | <0.001              | 47.3                  | 8.1  |
|                      | No Sac             | 4                   | 75.7% (68.6 - 82)               | 84.3 (78.4 - 90.3)         | 75.6      | 75.9      | 76.5       | 75.0       | <0.001              | 39.6                  | 8.6  |
|                      | No I3PA            | 4                   | 72.8% (65.4 - 79.3)             | 84.7 (79.1 - 90.4)         | 68.9      | 78.8      | 83.5       | 61.9       | 0.044               | 38.1                  | 8.7  |
|                      | No V4S             | 4                   | 79.9% (73 - 85.6)               | 86.6 (81 - 92.3)           | 75.2      | 86.8      | 89.4       | 70.2       | <0.001              | 33.6                  | 9.1  |
|                      | No LPC, No PI      | 3                   | 81.1% (74.3 - 86.7)             | 90.3 (85.8 - 94.7)         | 86.3      | 77.1      | 74.1       | 88.1       | <0.001              | 46.4                  | 8.1  |
|                      | No Sac, No LPC     | 3                   | 73.4% (66 - 79.9)               | 85.2 (79 - 91.5)           | 81.2      | 68.6      | 61.2       | 85.7       | 0.071               | 30.6                  | 9.3  |
|                      | No Sac, No PI      | 3                   | 82.2% (75.6 - 87.7)             | 85.9 (80.1 - 91.8)         | 84.0      | 80.7      | 80.0       | 84.5       | <0.001              | 35.5                  | 8.9  |
|                      | No Sac, No I3PA    | 3                   | 66.9% (59.2 - 73.9)             | 73.5 (66 - 80.9)           | 69.3      | 64.9      | 61.2       | 72.6       | 0.098               | 19.7                  | 10.0 |
|                      | No Sac, No V4S     | 3                   | 69.8% (62.3 - 76.6)             | 83.8 (77.8 - 89.9)         | 64.9      | 80.0      | 87.1       | 52.4       | 1                   | 24.3                  | 9.7  |
|                      | No I3PA, No LPC    | 3                   | 74% (66.7 - 80.4)               | 81.2 (74.8 - 87.6)         | 75.3      | 72.7      | 71.8       | 76.2       | <0.001              | 30.0                  | 9.3  |

| Comparison | Reduced candidates | Variables | Accuracy (%)<br>(Lower - Upper) | AUC (%)<br>(Lower - Upper) | SP<br>(%) | SN<br>(%) | NPV<br>(%) | PPV<br>(%) | adjusted<br>p-value | R <sup>2</sup><br>(%) | RMSE |
|------------|--------------------|-----------|---------------------------------|----------------------------|-----------|-----------|------------|------------|---------------------|-----------------------|------|
|            | No I3PA, No PI     | 3         | 72.8% (65.4 - 79.3)             | 83.6 (77.7 - 89.5)         | 69.3      | 77.9      | 82.4       | 63.1       | 0.015               | 34.1                  | 9.0  |
|            | No V4S, No LPC     | 3         | 79.3% (72.4 - 85.1)             | 88.1 (83.1 - 93)           | 78.4      | 80.2      | 81.2       | 77.4       | <0.001              | 39.2                  | 8.7  |
|            | No V4S, No PI      | 3         | 77.5% (70.5 - 83.6)             | 87.8 (82.5 - 93.2)         | 72.8      | 84.8      | 88.2       | 66.7       | <0.001              | 26.8                  | 9.5  |
|            | No I3PA, No VS4    | 3         | 75.1% (67.9 - 81.5)             | 83.8 (77.6 - 89.9)         | 69.0      | 87.5      | 91.8       | 58.3       | 0.638               | 22.3                  | 9.8  |
|            | Only I3PA and V4S  | 2         | 74% (66.7 - 80.4)               | 84.1 (77.5 - 90.8)         | 84.7      | 68.2      | 58.8       | 89.3       | 0.445               | 19.9                  | 10.0 |
|            | Only V4S and PI    | 2         | 62.7% (55 - 70)                 | 71.5 (63.8 - 79.1)         | 66.2      | 60.4      | 52.9       | 72.6       | 1                   | -11.8                 | 11.8 |
|            | Only IPA and PI    | 2         | 69.8% (62.3 - 76.6)             | 78.9 (72.2 - 85.7)         | 71.8      | 68.1      | 65.9       | 73.8       | 0.001               | 22.6                  | 9.8  |
|            | Only Sac and PI    | 2         | 71.6% (64.2 - 78.3)             | 80.6 (74.1 - 87.2)         | 69.1      | 75.0      | 78.8       | 64.3       | 0.005               | 21.3                  | 9.9  |
|            | Only LPC and PI    | 2         | 65.1% (57.4 - 72.2)             | 73.2 (65.7 - 80.7)         | 60.7      | 76.6      | 87.1       | 42.9       | 1                   | 3.8                   | 10.9 |
|            | Only Sac and V4S   | 2         | 71.6% (64.2 - 78.3)             | 78.4 (71.7 - 85.2)         | 77.6      | 67.6      | 61.2       | 82.1       | 0.079               | 27.0                  | 9.5  |
|            | Only LPC and VS4   | 2         | 64.5% (56.8 - 71.7)             | 70.6 (62.8 - 78.5)         | 67.6      | 62.2      | 56.5       | 72.6       | 1                   | -0.4                  | 11.1 |
|            | Only Sac and I3PA  | 2         | 77.5% (70.5 - 83.6)             | 86.3 (81 - 91.7)           | 75.3      | 80.3      | 82.4       | 72.6       | <0.001              | 35.1                  | 9.0  |
|            | Only I3PA and LPC  | 2         | 74% (66.7 - 80.4)               | 78.2 (71 - 85.4)           | 68.5      | 84.5      | 89.4       | 58.3       | 0.677               | 5.7                   | 10.8 |
|            | Only Sac and LPC   | 2         | 70.4% (62.9 - 77.2)             | 79.9 (73.1 - 86.8)         | 65.8      | 79.3      | 85.9       | 54.8       | 1                   | 9.3                   | 10.6 |

**Table S7.**

Statistical results from individual t-tests comparing a 4 h block pre- and post- habitual sleep interval for clock time matched (2-6 h day 2 vs 2-6 h day 3) and evening/morning (12-16 h day 2 vs 2-6 h day 3) in the Matched Control experiment (5 participants n = 3 per treatment).

| Metabolite          | Participant | Clock time Matched |     |                                |              |                 | Evening/Morning |     |                                |              |                 |
|---------------------|-------------|--------------------|-----|--------------------------------|--------------|-----------------|-----------------|-----|--------------------------------|--------------|-----------------|
|                     |             | t-value            | df  | mean difference (fdr adjusted) | p-value      | Trend           | t-value         | df  | mean difference (fdr adjusted) | p-value      | Trend           |
| Vanillin 4-sulfate  | 1           | 2.7                | 2.9 | -2.6                           | 0.186        | Not significant | 1.7             | 2.1 | -1.5                           | 0.376        | Not significant |
|                     | 2           | 0.4                | 3.3 | -0.3                           | 0.809        | Not significant | 0.1             | 3.0 | -0.1                           | 0.969        | Not significant |
|                     | 3           | -1.0               | 4.0 | 0.2                            | 0.510        | Not significant | -8.6            | 4.0 | 2.0                            | <b>0.021</b> | Increasing      |
|                     | 4           | 19.4               | 2.3 | -1.7                           | <b>0.021</b> | Decreasing      | -1.2            | 2.1 | 0.5                            | 0.508        | Not significant |
|                     | 5           | -8.9               | 3.7 | 2.4                            | <b>0.021</b> | Increasing      | -6.2            | 4.0 | 1.8                            | <b>0.044</b> | Increasing      |
| Indole 3-propionate | 1           | -2.5               | 3.8 | 0.7                            | 0.183        | Not significant | -3.1            | 3.4 | 0.8                            | 0.163        | Not significant |
|                     | 2           | 5.0                | 3.8 | -1.7                           | 0.071        | Not significant | 3.7             | 3.9 | -1.3                           | 0.092        | Not significant |
|                     | 3           | -5.1               | 3.0 | 1.3                            | 0.071        | Not significant | 0.7             | 2.2 | -0.4                           | 0.661        | Not significant |
|                     | 4           | -1.7               | 3.3 | 0.7                            | 0.335        | Not significant | -2.3            | 2.3 | 1.8                            | 0.249        | Not significant |
|                     | 5           | 5.6                | 4.0 | -1.4                           | 0.051        | Not significant | 1.2             | 2.4 | -0.2                           | 0.505        | Not significant |
| Monosaccharide 1    | 1           | -1.0               | 2.3 | 0.6                            | 0.510        | Not significant | 1.0             | 3.7 | -0.9                           | 0.510        | Not significant |
|                     | 2           | -1.0               | 3.9 | 0.5                            | 0.510        | Not significant | 1.8             | 2.1 | -0.6                           | 0.352        | Not significant |
|                     | 3           | 4.4                | 3.9 | -0.7                           | 0.071        | Not significant | -0.6            | 2.6 | 0.2                            | 0.703        | Not significant |
|                     | 4           | -0.6               | 3.9 | 0.3                            | 0.703        | Not significant | 0.5             | 4.0 | -0.3                           | 0.758        | Not significant |
|                     | 5           | 0.8                | 2.9 | -0.5                           | 0.615        | Not significant | 1.0             | 2.5 | -0.6                           | 0.510        | Not significant |
| PI(16:0/18:1)       | 1           | 1.8                | 2.4 | -0.9                           | 0.335        | Not significant | 4.4             | 3.1 | -1.3                           | 0.092        | Not significant |
|                     | 2           | 3.1                | 3.4 | -1.6                           | 0.163        | Not significant | 2.7             | 3.1 | -1.5                           | 0.183        | Not significant |
|                     | 3           | -3.2               | 2.8 | 1.1                            | 0.183        | Not significant | 0.1             | 4.0 | -0.1                           | 0.969        | Not significant |
|                     | 4           | -0.1               | 2.8 | 0.0                            | 0.969        | Not significant | 1.9             | 3.9 | -1.6                           | 0.249        | Not significant |
|                     | 5           | -1.1               | 2.3 | 0.4                            | 0.510        | Not significant | 1.4             | 4.0 | -0.8                           | 0.376        | Not significant |
| LPC(18:3)+CH2O3     | 1           | 2.6                | 3.2 | -0.7                           | 0.183        | Not significant | 2.4             | 2.2 | -1.4                           | 0.249        | Not significant |
|                     | 2           | 0.1                | 3.6 | 0.0                            | 0.969        | Not significant | 4.8             | 3.4 | -1.8                           | 0.071        | Not significant |
|                     | 3           | 0.0                | 3.8 | 0.0                            | 0.969        | Not significant | 2.1             | 3.4 | -1.4                           | 0.249        | Not significant |
|                     | 4           | 2.9                | 2.9 | -1.7                           | 0.183        | Not significant | 2.6             | 3.4 | -0.8                           | 0.183        | Not significant |
|                     | 5           | 2.1                | 3.0 | -1.0                           | 0.249        | Not significant | 4.4             | 3.9 | -1.3                           | 0.071        | Not significant |

## REFERENCES AND NOTES

1. K. Uehli, A.J. Mehta, D. Miedinger, K. Hug, C. Schindler, E. Holsboer-Trachsler, J.D. Leuppi, N. Kunzli, Sleep problems and work injuries: A systematic review and meta-analysis. *Sleep Med. Rev.* **18**, 61–73 (2014).
2. S. Bioulac J.A. Micoulaud-Franchi, M. Arnaud, P. Sagaspe, N. Moore, F. Salvo, P. Philip, Risk of motor vehicle accidents related to sleepiness at the wheel: A systematic review and meta-analysis. *Sleep* **40**, zsx134 (2017).
3. J. L. Lim, D. F. Dinges, in *Molecular and Biophysical Mechanisms of Arousal, Alertness, and Attention*, D. W. Pfaff, B. L. Kieffer, Eds. (2008), vol. 1129, pp. 305–322.
4. C. Anderson, J. A. Horne, Sleepiness enhances distraction during a monotonous task. *Sleep* **29**, 573–576 (2006).
5. J. Collet, S. Ftouni, M. Clough, S.W. Cain, J. Fielding, C. Anderson, Differential impact of sleep deprivation and circadian timing on reflexive versus inhibitory control of attention. *Sci. Rep.* **10**, 7270 (2020).
6. R. Stickgold, M. P. Walker, Sleep-dependent memory consolidation and reconsolidation. *Sleep Med.* **8**, 331–343 (2007).
7. M. W. L. Chee, Limitations on visual information processing in the sleep-deprived brain and their underlying mechanisms. *Curr. Opin. Behav. Sci.* **1**, 56–63 (2015).
8. Y. Harrison, J. A. Horne, The impact of sleep deprivation on decision making: A review. *J. Exp. Psychol. Appl.* **6**, 236–249 (2000).
9. C. Anderson, D. L. Dickinson, Bargaining and trust: The effects of 36-h total sleep deprivation on socially interactive decisions. *J. Sleep Res.* **19**, 54–63 (2010).
10. J. Maccora, J. E. Manousakis, C. Anderson, Pupillary instability as an accurate, objective marker of alertness failure and performance impairment. *J. Sleep Res.* **28**, e12739 (2019).

11. C. Cajochen, S. B. Khalsa, J. K. Wyatt, C. A. Czeisler, D. J. Dijk, EEG and ocular correlates of circadian melatonin phase and human performance decrements during sleep loss. *Am. J. Physiol.* **277**, R640–R649 (1999).
12. J. M. Mullington, S.M. Abbott, J.E. Carroll, C.J. Davis, D.J. Dijk, D.F. Dinges, P.R. Gehrman, G.S. Ginsburg, D. Gozal, M. Haack, D.C. Lim, M. Macrea, A.I. Pack, D.T. Plante, J.A. Teske, P.C. Zee, Developing biomarker arrays predicting sleep and circadian-coupled risks to health. *Sleep* **39**, 727–736 (2016).
13. B. J. Wilhelm, Pupillography for the assessment of driver sleepiness. *Klin. Monbl. Augenheilkd.* **225**, 791–798 (2008).
14. C. Anderson, A. M. Chang, J. P. Sullivan, J. M. Ronda, C. A. Czeisler, Assessment of drowsiness based on ocular parameters detected by infrared reflectance oculography. *J. Clin. Sleep Med.* **09**, 907–920 (2013).
15. C. Cajochen, Alerting effects of light. *Sleep Med. Rev.* **11**, 453–464 (2007).
16. L. K. McCorry, Physiology of the autonomic nervous system. *Am. J. Pharm. Educ.* **71**, 78 (2007).
17. L. Seugnet, J. Boero, L. Gottschalk, S. P. Duntley, P. J. Shaw, Identification of a biomarker for sleep drive in flies and humans. *Proc. Natl. Acad. Sci. U.S.A.* **103**, 19913–19918 (2006).
18. M. Pajcin, S. Banks, J.M. White, J. Dorrian, G. M. Paech, C. Grant, K. Johnson, K. Tooley, J. Fidock, G.H. Kamimori, C.B. Della Vedova, Decreased salivary alpha-amylase levels are associated with performance deficits during sleep loss. *Psychoneuroendocrinology* **78**, 131–141 (2017).
19. C. S. Möller-Levet, S.N. Archer, G. Bucca, E.E. Laing, A. Slak, R. Kabiljo, J.C. Lo, N. Santhi, M. von Schantz, C.P. Smith, D.J. Dijk, Effects of insufficient sleep on circadian rhythmicity and expression amplitude of the human blood transcriptome. *Proc. Natl. Acad. Sci. U.S.A.* **110**, E1132–E1141 (2013).

20. E. S. Arnardottir, E.V. Nikonova, K.R. Shockley, A.A. Podtelezchnikov, R.C. Anafi, K.Q. Tanis, G. Maislin, D.J. Stone, J.J. Renger, C.J. Winrow, A.I. Pack, Blood-gene expression reveals reduced circadian rhythmicity in individuals resistant to sleep deprivation. *Sleep* **37**, 1589–1600 (2014).
21. R. Pellegrino, D.Y. Sunaga, C. Guindalini, R.C. Martins, D.R. Mazzotti, Z. Wei, Z.J. Daye, M.L. Andersen, S Tufik, Whole blood genome-wide gene expression profile in males after prolonged wakefulness and sleep recovery. *Physiol. Genomics* **44**, 1003–1012 (2012).
22. E. E. Laing, C. S. Möller-Levet, D. J. Dijk, S. N. Archer, Identifying and validating blood mRNA biomarkers for acute and chronic insufficient sleep in humans: A machine learning approach. *Sleep* **42**, zsy186 (2019).
23. D. S. Wishart, Emerging applications of metabolomics in drug discovery and precision medicine. *Nat. Rev. Drug Discov.* **15**, 473–484 (2016).
24. S. K. Davies, J.E. Ang, V.L. Revell, B. Holmes, A. Mann, F.P. Robertson, N. Cui, B. Middleton, K. Ackermann, M. Kayser, A.E. Thumser, F.I. Raynaud, D.J. Skene, Effect of sleep deprivation on the human metabolome. *Proc. Natl. Acad. Sci. U.S.A.* **111**, 10761–10766 (2014).
25. E. C. P. Chua, G. Shui, I.T. Lee, P. Lau, L.C. Tan, S.C. Yeo, B.D. Lam, S. Bulchand, S.A. Summers, K. Puvanendran, S.G. Rozen, M.R. Wenk, J.J. Gooley, Extensive diversity in circadian regulation of plasma lipids and evidence for different circadian metabolic phenotypes in humans. *Proc. Natl. Acad. Sci. U.S.A.* **110**, 14468–14473 (2013).
26. L. K. Grant, S. Ftouni, B. Nijagal, D.P. De Souza, D. Tull, M.J. McConville, S.M.W. Rajaratnam, S.W. Lockley, C. Anderson, Circadian and wake-dependent changes in human plasma polar metabolites during prolonged wakefulness: A preliminary analysis. *Sci. Rep.* **9**, 4428 (2019).
27. C. M. Depner, D.T. Cogswell, P.J. Bisesi, R.R. Markwald, C. Cruickshank-Quinn, K. Quinn, E.L. Melanson, N. Reisdorph, K.P. Wright, Developing preliminary blood metabolomics-based biomarkers of insufficient sleep in humans. *Sleep* **43**, zsz321 (2020).



28. A. M. Weljie, P. Meerlo, N. Goel, A. Sengupta, M.S. Kayser, T. Abel, M.J. Birnbaum, D.F. Dinges, A. Sehgal, Oxalic acid and diacylglycerol 36:3 are cross-species markers of sleep debt. *Proc. Natl. Acad. Sci. U.S.A.* **112**, 2569–2574 (2015).
29. J. H. Marcus, M. R. Rosekind, Fatigue in transportation: NTSB investigations and safety recommendations. *Inj. Prev.* **23**, 232–238 (2017).
30. A. G. Verstraete, Oral fluid testing for driving under the influence of drugs: History, recent progress and remaining challenges. *Forensic Sci. Int.* **150**, 143–150 (2005).
31. S. Ganesan, M. Magee, J.E. Stone, M.D. Mulhall, A. Collins, M.E. Howard, S.W. Lockley, S.M.W. Rajaratnam, T.L. Sletten, The impact of shift work on sleep, alertness and performance in healthcare workers. *Sci. Rep.* **9**, 4635 (2019).
32. P. Knauth, Extended work periods. *Ind. Health* **45**, 125–136 (2007).
33. T. Roenneberg, K. V. Allebrandt, M. Merrow, C. Vetter, Social jetlag and obesity. *Curr. Biol.* **22**, 939–943 (2012).
34. P. T. George, The psycho-sensory wake drive—A power source for power naps and other common sleep-wake phenomena: A hypothesis. *Sleep Breath.* **22**, 41–48 (2018).
35. H. P. Van Dongen, M. D. Baynard, G. Maislin, D. F. Dinges, Systematic interindividual differences in neurobehavioral impairment from sleep loss: Evidence of trait-like differential vulnerability. *Sleep* **27**, 423–433 (2004).
36. M. J. Gasson, Y. Kitamura, W.R. McLauchlan, A. Narbad, A.J. Parr, E.L. Parsons, J. Payne, M.J. Rhodes, N.J. Walton, Metabolism of ferulic acid to vanillin. A bacterial gene of the enoyl-SCoA hydratase/isomerase superfamily encodes an enzyme for the hydration and cleavage of a hydroxycinnamic acid SCoA thioester. *J. Biol. Chem.* **273**, 4163–4170 (1998).
37. M. V. Selma, J. C. Espín, F. A. Tomás-Barberán, Interaction between phenolics and gut microbiota: Role in human health. *J. Agric. Food Chem.* **57**, 6485–6501 (2009).

38. T. Marjot, D. W. Ray, F. R. Williams, J. W. Tomlinson, M. J. Armstrong, Sleep and liver disease: A bidirectional relationship. *Lancet Gastroenterol. Hepatol.* **6**, 850–863 (2021).
39. Y. J. Chyan, B. Poeggeler, R.A. Omar, D.G. Chain, B. Frangione, J. Ghiso, M.A. Pappolla, Potent neuroprotective properties against the Alzheimer  $\beta$ -amyloid by an endogenous melatonin-related indole structure, indole-3-propionic acid. *J. Biol. Chem.* **274**, 21937–21942 (1999).
40. R. J. Reiter, J. M. Guerrero, J. J. Garcia, D. Acuna-Castroviejo, Reactive oxygen intermediates, molecular damage, and aging: Relation to melatonin. *Ann. N. Y. Acad. Sci.* **854**, 410–424 (1998).
41. D. G. Chain, Galasko, D., Neria, E., M. Pappolla, Bendheim, P.E., B. Poeggler, Antioxidants in the treatment of Alzheimer's disease: Breakthrough potential of indole-3propionic acid, in *Drug Discovery and Development for Alzheimer's Disease, 2000* (Springer Publishing Company, 2002), pp. 159–170.
42. P. E. Bendheim, Development of indole-3-propionic acid (OXIGON) for Alzheimer's disease. *J. Mol. Neurosci.* **19**, 213–217 (2002).
43. M. Tuomainen, J. Lindström, M. Lehtonen, S. Auriola, J. Pihlajamäki, M. Peltonen, J. Tuomilehto, M. Uusitupa, V.D. de Mello, K. Hanhineva, Associations of serum indolepropionic acid, a gut microbiota metabolite, with type 2 diabetes and low-grade inflammation in high-risk individuals. *Nutr. Diabetes* **8**, 35 (2018).
44. V. D. De Mello, J Paananen, J Lindström, M.A. Lankinen, L. Shi, J. Kuusisto, J Pihlajamäki, S. Auriola, M. Lehtonen, O Rolandsson, I.A. Bergdahl, E. Nordin, P. Ilanne-Parikka, S. Keinänen-Kiukaanniemi, R. Landberg, J.G. Eriksson, J. Tuomilehto, K. Hanhineva, M Uusitupa, Indolepropionic acid and novel lipid metabolites are associated with a lower risk of type 2 diabetes in the Finnish Diabetes Prevention Study. *Sci. Rep.* **7**, rep46337 (2017).
45. C. Chimere, E. Emery, D.K. Summers, U. Keyser, F.M. Gribble, F. Reimann, Bacterial metabolite indole modulates incretin secretion from intestinal enteroendocrine L cells. *Cell Rep.* **9**, 1202–1208 (2014).

46. L. Shi, S.J. Chen, M.Y. Ma, Y.P. Bao, Y. Han, Y.M. Wang, J. Shi, M.V. Vitiello, L. Lu, Sleep disturbances increase the risk of dementia: A systematic review and meta-analysis. *Sleep Med. Rev.* **40**, 4–16 (2018).
47. J. Van Erum, D. Van Dam, P. P. De Deyn, Sleep and Alzheimer's disease: A pivotal role for the suprachiasmatic nucleus. *Sleep Med. Rev.* **40**, 17–27 (2018).
48. O. Itani, M. Jike, N. Watanabe, Y. Kaneita, Short sleep duration and health outcomes: A systematic review, meta-analysis, and meta-regression. *Sleep Med.* **32**, 246–256 (2017).
49. E. C. P. Chua, G. H. Shui, A. Cazenave-Gassiot, M. R. Wenk, J. J. Gooley, Changes in plasma lipids during exposure to total sleep deprivation. *Sleep* **38**, 1683–1691 (2015).
50. R. Dallmann, A. U. Viola, L. Tarokh, C. Cajochen, S. A. Brown, The human circadian metabolome. *Proc. Natl. Acad. Sci. U.S.A.* **109**, 2625–2629 (2012).
51. E. Maury, K. M. Ramsey, J. Bass, in *Metabolic Basis of Obesity* (2011), pp. 229–255.
52. G. Di Paolo, P. De Camilli, Phosphoinositides in cell regulation and membrane dynamics. *Nature* **443**, 651–657 (2006).
53. S.-H. Law, M.L. Chan, G.K. Marathe, F. Parveen, C.H. Chen, L.Y. Ke, An updated review of lysophosphatidylcholine metabolism in human diseases. *Int. J. Mol. Sci.* **20**, 1149 (2019).
54. V.-P. Mäkinen, M. Ala-Korpela, Metabolomics of aging requires large-scale longitudinal studies with replication. *Proc. Natl. Acad. Sci. U.S.A.* **113**, E3470 (2016).
55. O. Robinson, C. E. Lau, Measuring biological age using metabolomics. *Aging* **12**, 22352–22353 (2020).
56. P. Vidafar, J.J. Gooley, A.C. Burns, S.M.W. Rajaratnam, M. Rueger, E. Van Reen, C.A. Czeisler, S.W. Lockley, S.W. Cain, Increased vulnerability to attentional failure during acute sleep deprivation in women depends on menstrual phase. *Sleep* **41**, zsy098 (2018).

57. J. M. Mullington, Please forgive our appearance while under biomarker construction. *Sleep* **42**, zsy267 (2019).
58. W. R. McMahon, S. Ftouni, S.P.A. Drummond, P. Maruff, S.W. Lockley, S.M.W. Rajaratnam, C. Anderson, The wake maintenance zone shows task dependent changes in cognitive function following one night without sleep. *Sleep*, **41**, zsy148 (2018).
59. *Australian Dietary Guidelines* (2013).
60. R. J. Stewart, L. Whitehead, B. Nijagal, B.E. Sleebbs, G. Lessene, M.J. McConville, K.L. Rogers, C.J. Tonkin, Analysis of Ca<sup>2+</sup> mediated signaling regulating toxoplasma infectivity reveals complex relationships between key molecules. *Cell. Microbiol.* **19**, cmi.12685 (2017).
61. R. Tautenhahn, C. Bottcher, S. Neumann, Highly sensitive feature detection for high resolution LC/MS. *BMC Bioinformatics* **9**, 504 (2008).
62. T. L. Sletten, S. Vincenzi, J. R. Redman, S. W. Lockley, S. M. Rajaratnam, Timing of sleep and its relationship with the endogenous melatonin rhythm. *Front. Neurol.* **1**, 137 (2010).
63. D. J. Creek, A. Jankevics, K. E. V. Burgess, R. Breitling, M. P. Barrett, IDEOM: An Excel interface for analysis of LC-MS-based metabolomics data. *Bioinformatics.* **28**, 1048–1049 (2012).
64. L. W. Sumner, A. Amberg, D. Barrett, M. H. Beale, R. Beger, C. A. Daykin, Teresa W-M Fan, O. Fiehn, R. Goodacre, J. L. Griffin, T. Hankemeier, N. Hardy, J. Harnly, R. Higashi, J. Kopka, A. N. Lane, J. C. Lindon, P. Marriott, A. W. Nicholls, M. D. Reily, J. J. Thaden, M. R. Viant, Proposed minimum reporting standards for chemical analysis Chemical Analysis Working Group (CAWG) Metabolomics Standards Initiative (MSI). *Metabolomics* **3**, 211–221 (2007).
65. T. M. Deist, F.J.W.M. Dankers, G. Valdes, R. Wijsman, I.C. Hsu, C. Oberije, T. Lustberg, J. van Soest, F. Hoebbers, A. Jochems, I. El Naqa, L. Wee, O. Morin, D.R. Raleigh, W. Bots, J.H. Kaanders, J. Belderbos, M. Kwint, T. Solberg, R. Monshouwer, J. Bussink, A. Dekker, P. Lambin, Machine learning algorithms for outcome prediction in (chemo)radiotherapy: An empirical comparison of classifiers. *Med. Phys.* **45**, 3449–3459 (2018).

66. S. I. Dimitriadis, D. Liparas, Alzheimer's Disease Neuroimaging Initiative; How random is the random forest? Random forest algorithm on the service of structural imaging biomarkers for Alzheimer's disease: From Alzheimer's disease neuroimaging initiative (ADNI) database. *Neural Regen. Res.* **13**, 962–970 (2018).
67. Y. Fan, T.B. Murphy, J.C. Byrne, L. Brennan, J.M. Fitzpatrick, R.W. Watson, Applying random forests to identify biomarker panels in serum 2D-DIGE data for the detection and staging of prostate cancer. *J. Proteome Res.* **10**, 1361–1373 (2011).
68. Z. Yan, J. Li, Y. Xiong, W. Xu, G. Zheng, Identification of candidate colon cancer biomarkers by applying a random forest approach on microarray data. *Oncol. Rep.* **28**, 1036–1042 (2012).
69. A. Liaw, M. Wiener, Classification and regression by randomForest. *R News* **2**, 18–22 (2002).
70. R. Genuer, J. M. Poggi, C. Tuleau-Malot, VSURF: An R package for variable selection using random forests. *R J.* **7**, 19–33 (2015).
71. D. Bates, M. Mächler, B. Bolker, S. Walker, Fitting linear mixed-effects models using lme4. *J. Stat. Softw.* **67**, 1–48 (2015).
